# Supplementary material for: A cost-minimisation analysis of performing point-of-care ultrasonography on patients with vaginal bleeding in early pregnancy in general practice: a decision analytical model
Source: Springer Nature journal article supplement (doi:10.1186/s12913-022-07463-y), 2022-01-11

## Additional file 1. Template for questionnaire.

(translated from the original Danish version)

### Questionnaire regarding patients with vaginal bleeding in early pregnancy who consult GPs

This questionnaire is developed to GPs who see the patient population: *Women with vaginal bleeding in early pregnancy (1<sup>st</sup> trimester)*. The purpose of this questionnaire is to investigate the pattern of referral for this patient population in the two different scenarios: scenario A and scenario B. The scenarios vary in relation to having access to an ultrasonography scanner in the consultation with the patient. **Answers to both scenarios are required!**

**Gender:**  Female  Male  Other

**Work location:**  North Denmark Region  Central Denmark Region  
 Region of Southern Denmark  Region Zealand  
 Capital Region of Denmark

**Do you use ultrasonography scanner in your daily work?**  Yes  No

**If yes, how many years have you used an ultrasonography scanner?** \_\_\_\_\_ Year(s)

### Scenario A: You do not have access to an ultrasonography scanner

|                                                                                                                                                                                                                                                            |                                                                                                                                                                                                                                                                                 |
|------------------------------------------------------------------------------------------------------------------------------------------------------------------------------------------------------------------------------------------------------------|---------------------------------------------------------------------------------------------------------------------------------------------------------------------------------------------------------------------------------------------------------------------------------|
| <p><b>A.1:</b> If you DO NOT have the possibility to perform a transvaginal ultrasonography scanning in your consultation with women with vaginal bleeding in early pregnancy (1<sup>st</sup> trimester), where will you then refer these patients to:</p> | <p><input type="checkbox"/> Mostly/only private gynaecologist</p> <p><input type="checkbox"/> Mostly/only hospital</p> <p><input type="checkbox"/> It varies, I refer to both</p> <p><input type="checkbox"/> None of the above (please elaborate on the back of the paper)</p> |
| <p><b>A.2:</b> If it varies, what percentage of the patients will you refer to a private gynaecologist or to the hospital, respectively?</p>                                                                                                               | <p>Private gynaecologist:<br/>_____ %</p> <p>Hospital:<br/>_____ %</p>                                                                                                                                                                                                          |

Scenario B: You do have access to an ultrasonography scanner

|                                                                                                                                                                                                              |                                                                                                                                                                                                                                                                                 |
|--------------------------------------------------------------------------------------------------------------------------------------------------------------------------------------------------------------|---------------------------------------------------------------------------------------------------------------------------------------------------------------------------------------------------------------------------------------------------------------------------------|
| <p><b>B.1:</b> What percentage of women with vaginal bleeding in early pregnancy (1<sup>st</sup> trimester) do you estimate to complete the clinical management of?</p>                                      | <p>_____ %</p>                                                                                                                                                                                                                                                                  |
| <p><b>B.2:</b> If you think you are not able to complete the clinical management of the patient, where will you then refer the patients to?</p>                                                              | <p><input type="checkbox"/> Mostly/only private gynaecologist</p> <p><input type="checkbox"/> Mostly/only hospital</p> <p><input type="checkbox"/> It varies, I refer to both</p> <p><input type="checkbox"/> None of the above (please elaborate on the back of the paper)</p> |
| <p><b>B.3:</b> If it varies, what percentage of the patients that you are not able to complete the clinically management of, will you refer to a private gynaecologist or to the hospital, respectively?</p> | <p>Private gynaecologist:<br/>_____ %</p> <p>Hospital:<br/>_____ %</p>                                                                                                                                                                                                          |

Elaboration of question A.1

Elaboration of question B.2

Additional comments

*Thank you for your response!*

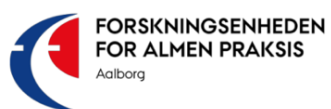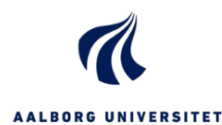

Supplement: MOESM1 [file 20021134]
