# Supplementary material for: A cost-minimisation analysis of performing point-of-care ultrasonography on patients with vaginal bleeding in early pregnancy in general practice: a decision analytical model
Source: Springer Nature journal article supplement (doi:10.1186/s12913-022-07463-y), 2022-01-11
Supplement: MOESM2 [file 20021134]

## Additional file 2. Raw response data from anonymous general practitioners.

| Doctor No.     | Gender | Region                     | POCUS in usual practice | Year(s)     | A.1                   | A.2<br>(%, gynaecologist/hospital) | B.1<br>(%)   | Referral<br>(%) | B.2                   | B.3<br>(%, gynaecologist/hospital) | Additional comments                                                                                                                       |
|----------------|--------|----------------------------|-------------------------|-------------|-----------------------|------------------------------------|--------------|-----------------|-----------------------|------------------------------------|-------------------------------------------------------------------------------------------------------------------------------------------|
| 1              | Female | Central Denmark Region     | No                      | -           | Hospital              | 0/100                              | 50           | 50              | Hospital              | 0/100                              | -                                                                                                                                         |
| 2              | Male   | Region of Southern Denmark | Yes                     | 10          | Hospital              | 0/100                              | 60           | 40              | Hospital              | 0/100                              | -                                                                                                                                         |
| 3              | Male   | Central Denmark Region     | Yes                     | 2           | Hospital              | 0/100                              | 50           | 50              | Hospital              | 0/100                              | -                                                                                                                                         |
| 4              | Male   | North Denmark Region       | Yes                     | 5           | Hospital              | 0/100                              | 75           | 25              | Hospital              | 0/100                              | -                                                                                                                                         |
| 5              | -      | Capital Region of Denmark  | Yes                     | -           | Hospital              | 0/100                              | 40           | 60              | Hospital              | 0/100                              | -                                                                                                                                         |
| 6              | Female | Central Denmark Region     | Yes                     | 15          | Hospital              | 1/99                               | 92,5         | 7,5             | Hospital              | 0/100                              | -                                                                                                                                         |
| 7              | Male   | Region of Southern Denmark | Yes                     | 5           | Private gynaecologist | 100/0                              | 95           | 5               | Private gynaecologist | 100/0                              | B.2: only when treatment at the hospital is expected to be required.                                                                      |
| 8              | Male   | North Denmark Region       | Yes                     | 6           | Hospital              | 0/100                              | 95           | 5               | Hospital              | 0/100                              | B.2: Often I can complete the clinical management of the patients. In case of suspicion of extrauterine pregnancy, patients are referred. |
| 9              | Female | Region of Southern Denmark | Yes                     | 1           | Hospital              | 0/100                              | 80           | 20              | Hospital              | 0/100                              | A.1: The number of private gynaecologists in my area is very limited.                                                                     |
| 10             | Male   | Capital Region of Denmark  | Yes                     | 2           | Hospital              | 0/100                              | 95           | 5               | Hospital              | 0/100                              | -                                                                                                                                         |
| 11             | Male   | Region of Southern Denmark | Yes                     | 2,5         | -                     | -                                  | 50           | 50              | Hospital              | 0/100                              | -                                                                                                                                         |
| 12             | Male   | North Denmark Region       | Yes                     | 4           | Hospital              | 20/80                              | 80           | 20              | Hospital              | 10/90                              | B.2: Patients who are worried about spontaneous abortion are very happy to have a fast clarification without the need for a referral.     |
| 13             | Male   | North Denmark Region       | Yes                     | 4           | Private gynaecologist | 90/10                              | 80           | 20              | Both                  | 30/70                              | A.1: Hospitals offer acute consultations. Other: Often hospital as further examinations or operations are often required.                 |
| 14             | Male   | Region of Southern Denmark | Yes                     | 2           | Both                  | 30/70                              | 75           | 25              | Private gynaecologist | 50/50                              | -                                                                                                                                         |
| 15             | Male   | Region of Southern Denmark | Yes                     | 1           | Both                  | 75/25                              | 75           | 25              | Both                  | 50/50                              | -                                                                                                                                         |
| 16             | Male   | Central Denmark Region     | Yes                     | 2           | Hospital              | 10/90                              | 50           | 50              | Hospital              | 10/90                              | -                                                                                                                                         |
| 17             | Female | North Denmark Region       | Yes                     | 4           | Hospital              | 0/100                              | 60           | 40              | Hospital              | 0/100                              | -                                                                                                                                         |
| 18             | Male   | Region of Southern Denmark | Yes                     | 5           | Hospital              | 0/100                              | 90           | 10              | Hospital              | 20/80                              | -                                                                                                                                         |
| 19             | Male   | Region of Southern Denmark | Yes                     | 5           | Private gynaecologist | 100/0                              | 98           | 2               | Hospital              | 0/100                              | B.2: If patients have a missed abortion, I refer them to the hospital for a curettage of the uterus.                                      |
| 20             | Male   | Capital Region of Denmark  | Yes                     | 6           | Both                  | 25/75                              | 66           | 34              | Both                  | 10/90                              | -                                                                                                                                         |
| 21             | Male   | Capital Region of Denmark  | Yes                     | 1           | Hospital              | 10/90                              | 75           | 25              | Hospital              | 0/100                              | -                                                                                                                                         |
| 22             | Male   | Capital Region of Denmark  | Yes                     | 3           | -                     | -                                  | 75           | 25              | Both                  | 75/25                              | -                                                                                                                                         |
| <b>Average</b> |        |                            |                         | <b>3,43</b> |                       | <b>23/77</b>                       | <b>73,02</b> | <b>26,98</b>    |                       | <b>16/84</b>                       |                                                                                                                                           |

The sign (-) indicates no response.
